# Supplementary material
Source: HighWire-hosted journal article supplement (https://bmjopen.bmj.com/content/9/6/e025821)
Supplement: inline-supplementary-material-1 [file inline-supplementary-material-1.pdf]

## Examples of open-ended interview questions

### Introductory interview questions

- a. What is your professional involvement in relation to [differences of sex development]?
- b. What procedures does this team follow when working with [differences of sex development]?
- c. Can you describe how you present the various treatment possibilities to parents, and how you tell parents about the course of treatment you recommend?

### Clitoral surgery questions

- a. What is your view on the age at which clitoral reduction might reasonably be carried out, and whether or not it should be done at all?
- b. What are the main reasons that you would see as important, and that you would give to parents, when explaining why clitoral reduction is (or is not) advisable?
- c. In what way do you consider clitoral surgery as important for psycho-social results?
- d. What are the pleasing results you have seen?
- e. How do you know when a child or adolescent you have treated is happy with their treatment?
- f. What would you consider to be key outcome measures that would mark the success (or otherwise) of clitoral reduction?
